# Supplementary material for: An Inexpensive Incubator for Mammalian Cell Culture Capable of Regulating O2, CO2, and Temperature
Source: MDPI journal article supplement (doi:10.3390/oxygen2010003), 2022-03-14
Supplement: s1 [file s1]

Archive with 1 entries (1 files):
- oxygen-1618460-supplementary.pdf
